# Supplementary material for: Drosophila as a Model of Unconventional Translation in Spinocerebellar Ataxia Type 3
Source: MDPI journal article supplement (doi:10.3390/cells11071223), 2022-04-04
Supplement: s1 [file s1]

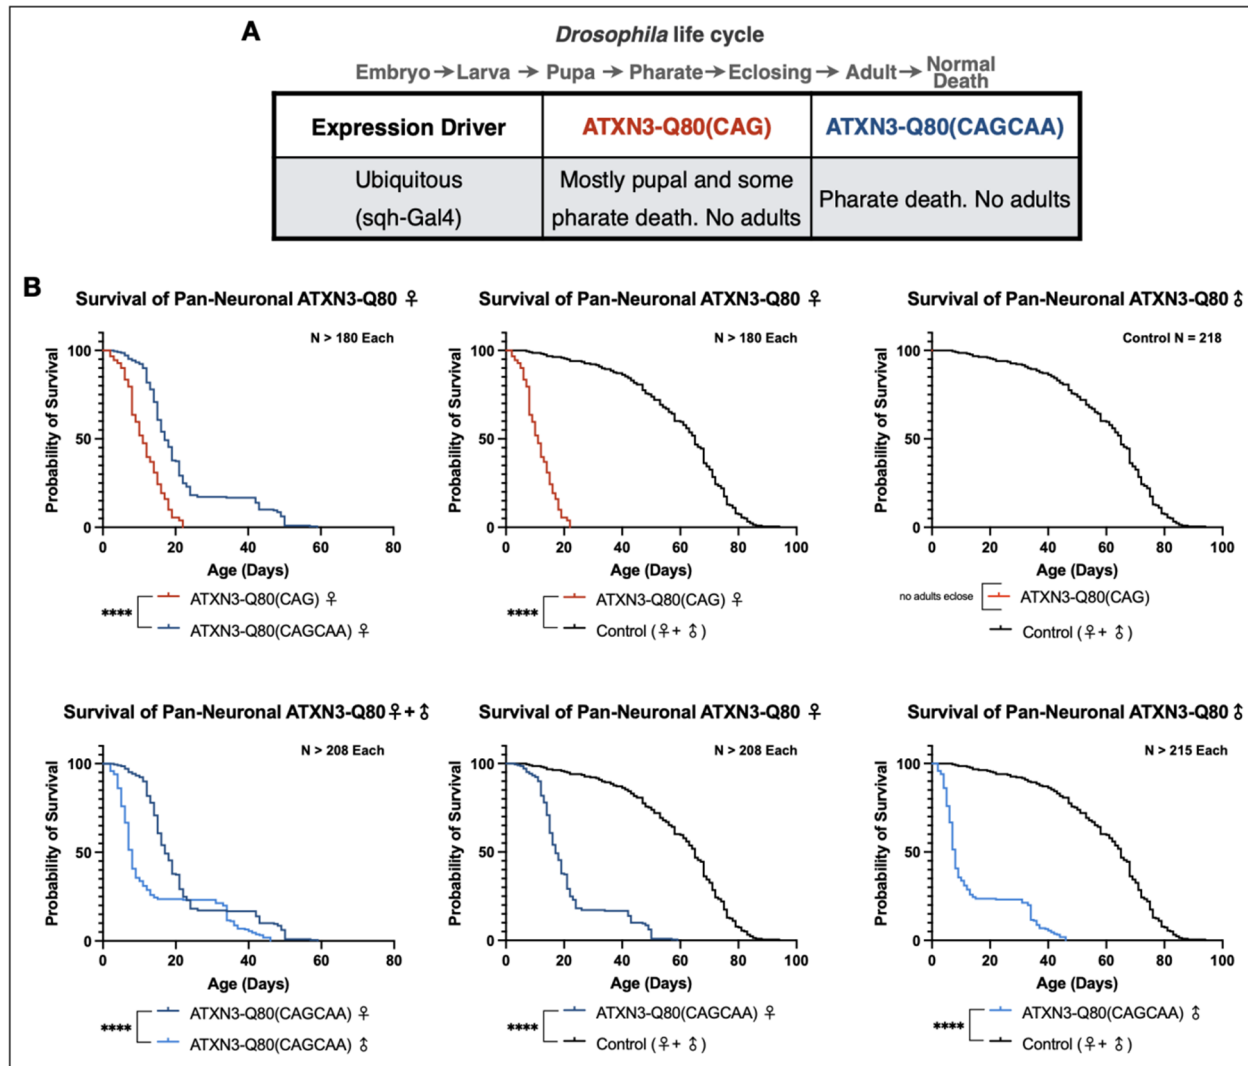

**Figure S1. Ubiquitous expression longevity data and individual comparisons from survival analysis in figure 2**

(A) Ubiquitous expression of ATXN3-Q80(CAG) and ATXN3-Q80(CAGCAA) individually was developmentally lethal in flies. Observations of developmental deaths in both lines based on the fly life cycle (shown at top of figure) showed ATXN3-Q80(CAG) flies dying primarily at earlier developmental stages than flies ubiquitously expressing ATXN3-Q80(CAGCAA). These observations were confirmed with survival analysis in tissue-specific expression models shown in figure 2. (B) Individual comparisons of all pan-neuronal expressing fly lines shown in figure 2E. \*\*\*\*:  $p < 0.0332$ ; \*\*\*:  $p < 0.0021$ ; \*\*:  $p < 0.0002$ ; \*:  $p < 0.0001$ . p-values from log-rank test. No adults eclosed in the glial expression analysis in figure 2F, thus no individual comparisons were made.

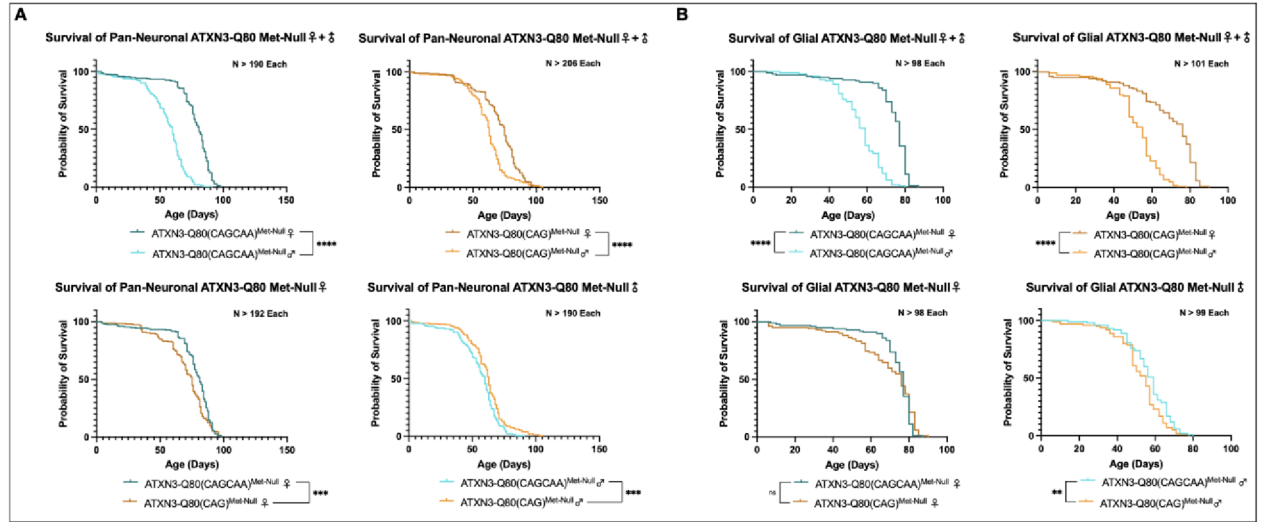

**Figure S2. Individual comparisons from survival analysis in figure 6**

(A) Individual comparisons of all pan-neuronal expressing fly lines shown in figure 6A. “\*”:  $p < 0.0332$ ; “\*\*”:  $p < 0.0021$ ; “\*\*\*”:  $p < 0.0002$ ; “\*\*\*\*”:  $p < 0.0001$ . p-values from log-rank test. (B) Individual comparisons of all glial expressing fly lines shown in figure 6C. “ns”: non-statistically significant; “\*”:  $p < 0.0332$ ; “\*\*”:  $p < 0.0021$ ; “\*\*\*”:  $p < 0.0002$ ; “\*\*\*\*”:  $p < 0.0001$ . p-values from log-rank test.

**A****Ubiquitous ATXN3-Q80(CAG)**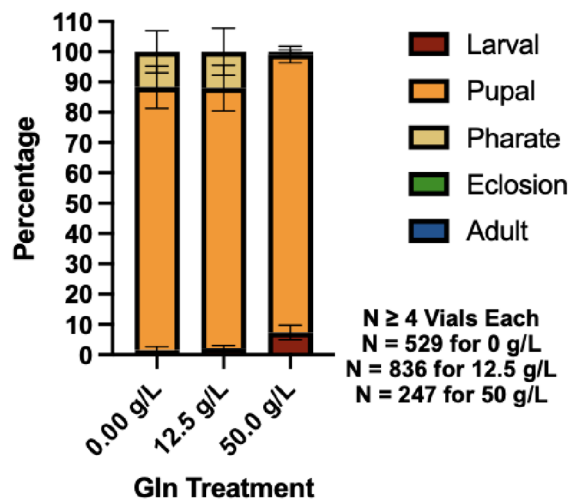

|                     |          | Glutamine Treatment (g/L) |      |      |
|---------------------|----------|---------------------------|------|------|
|                     |          | 0.00                      | 0.00 | 12.5 |
| Statistics          |          | vs                        | vs   | vs   |
|                     |          | 12.5                      | 50.0 | 50.0 |
| Developmental Stage | Larval   | ns                        | ns   | ns   |
|                     | ↓        |                           |      |      |
|                     | Pupal    | ns                        | ns   | ns   |
|                     | ↓        |                           |      |      |
|                     | Pharate  | ns                        | ns   | ns   |
| Developmental Stage | ↓        |                           |      |      |
|                     | Eclosion | ns                        | ns   | ns   |
|                     | ↓        |                           |      |      |
| Developmental Stage | Adult    | ns                        | ns   | ns   |

**B****Ubiquitous ATXN3-Q80(CAGCAA)**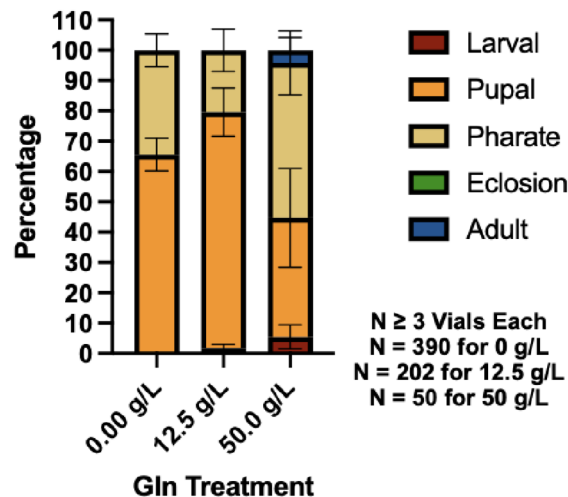

|                     |          | Glutamine Treatment (g/L) |      |      |
|---------------------|----------|---------------------------|------|------|
|                     |          | 0.00                      | 0.00 | 12.5 |
| Statistics          |          | vs                        | vs   | vs   |
|                     |          | 12.5                      | 50.0 | 50.0 |
| Developmental Stage | Larval   | ns                        | ns   | ns   |
|                     | ↓        |                           |      |      |
|                     | Pupal    | ns                        | ns   | ns   |
|                     | ↓        |                           |      |      |
|                     | Pharate  | ns                        | ns   | ns   |
| Developmental Stage | ↓        |                           |      |      |
|                     | Eclosion | ns                        | ns   | ns   |
|                     | ↓        |                           |      |      |
| Developmental Stage | Adult    | ns                        | ns   | ns   |

**Figure S3. Developmental deaths of ATXN3-Q80-expressing flies with glutamine supplementation**

(A) Developmental death tracking based on the percentage of fly deaths at each developmental stage in flies ubiquitously expressing ATXN3-Q80(CAG) in food with 0.00, 12.5, or 50.0 g/L glutamine supplementation. Driver was sqh-Gal4. Each liter of food made accounted for 100 fly vials, with each vial then receiving an additional 0.000, 0.125, or 0.500 g/L of glutamine respectively. Means of percentages at each stage +/- SEM. "ns": non-statistically significant. p-values of all comparisons shown to the right of graph from RM two-way ANOVA with Geisser-Greenhouse correction and Tukey's multiple comparison test. n ≥ 3 vials each. (B) Developmental death tracking based on percentage of fly deaths at each developmental stage in flies ubiquitously expressing ATXN3-Q80(CAGCAA) in food with 0.00, 12.5, or 50.0 g/L glutamine supplementation in food. Means of percentages at each stage +/- SEM. "ns": nonstatistically significant. p-values of all comparisons shown to the right of graph and from RM two-way ANOVA with Geisser-Greenhouse correction and Tukey's multiple comparison test. n ≥ 3 vials each.

Figure S4: Nucleotide sequences for Panel 5A

**Met-Null CAGCAA Sequence**

GAATTCATTTAGGAATAGTAGGAGTCCATCTTCCACGAGAA  
ACAAGAAGGCTCACTTTGTGCTCAACATTGCCTGAATAACT  
TATTGCAAGGAGAATATTTTAGCCCTGTGGAATTATCCTCAA  
TTGCACATCAGCTGGATGAGGAGGAGAGGTAGAGATAGGC  
AGAAGGAGGAGTTACTAGTGAAGATTATCGCACGTTTTTAC  
AGCAGCCTTCTGGAAATTAGGATGACAGTGGTTTTTCTCT  
ATTCAGGTTATAAGCAATGCCTTGAAAGTTTGGGGTTTAGAA  
CTAATCCTGTTCAACAGTCCAGAGTATCAGAGGCTCAGGAT  
CGATCCTATAAATGAAAGATCATTTATATGCAATTATAAGGAA  
CACTGGTTTACAGTTAGAAAATTAGGAAAACAGTGGTTTAA  
CTTGAATTCTCTCTTGACGGGTCCAGAATTAATATCAGATAC  
ATATCTTGCACTTTTCTTGGCTCAATTACAACAGGAAGGTTA  
TTCTATATTTGTCGTTAAGGGTGATCTGCCAGATTGCGAAGC  
TGACCAACTCCTGCAGTAGATTAGGGTCCAACAGTAGCAT  
CGACCAAACTTATTGGAGAAGAATTAGCACAACTAAAAGA  
GCAAAGAGTCCATAAAACAGACCTGGAACGAGTGTTAGAA  
GCAAATGATGGCTCAGGATAGTTAGACGAAGATGAGGAGG  
ATTTGCAGAGGGCTCTGGCACTAAGTCGCCAAGAAATTGA  
CTAGGAAGATGAGGAAGCAGATCTCCGCAGGGCTATTTCAG  
CTAAGTTAGCAAGGTAGTTCCAGAAACATATCTCAAGATTAG  
ACACAGACATCAGGTACAAATCTTACTTCAGAAGAGCTTCG  
GAAGAGACGAGAAGCCTACTTTGAAAAACAGCAACAGAAA  
CAACAGCAACAGCAACAGCAACAGCAACAGCAACAGCAA  
CAGCAACAGCAACAGCAACAGCAACAGCAACAGCAACAG  
CAACAGCAACAGCAACAGCAACAGCAACAGCAACAGCAA  
CAGCAACAGCAACAGCAACAGCAACAGCAACAGCAACAG  
CAACAGCAACAGCAACAGCAACAGCAACAGCAACAGCAA  
CAGCAACAGCAACAGCAACAGCAACAGCAACAGCAACAA  
CAGCAAGGGGACCTATCAGGACAGAGTTCACATCCATGCG  
AAAGGCCAGCCACCAAGTTCAGGAGCACTTGGGAGCGATC  
TCGGCGATGCTTAGAGCGAAGAAGACTAGCTTCAGGCAG  
CTGTCACTAGTCTTTGGAACTGTCAGAAACGATTTGAAA  
ACAGAAGGAAAAAATACCCATACGATGTTCCAGATTACGC  
TTAATAAAATGGAACAAAACTTATTTCTGAAGAAGATCTGT  
GGTAAGCCTATCCCTAACCCTCTCCTCGGTCTCGATTCTAC  
GTAATAATCTAGA

**Met-Null CAGCAG Sequence**

GAATTCATTTAGGAATAGTAGGAGTCCATCTTCCACGAGAA  
ACAAGAAGGCTCACTTTGTGCTCAACATTGCCTGAATAACT  
TATTGCAAGGAGAATATTTTAGCCCTGTGGAATTATCCTCAA  
TTGCACATCAGCTGGATGAGGAGGAGAGGTAGAGATAGGC  
AGAAGGAGGAGTTACTAGTGAAGATTATCGCACGTTTTTAC  
AGCAGCCTTCTGGAAATTAGGATGACAGTGGTTTTTCTCT  
ATTCAGGTTATAAGCAATGCCTTGAAAGTTTGGGGTTTAGAA  
CTAATCCTGTTCAACAGTCCAGAGTATCAGAGGCTCAGGAT  
CGATCCTATAAATGAAAGATCATTTATATGCAATTATAAGGAA  
CACTGGTTTACAGTTAGAAAATTAGGAAAACAGTGGTTTAA  
CTTGAATTCTCTCTTGACGGGTCCAGAATTAATATCAGATAC  
ATATCTTGCACTTTTCTTGGCTCAATTACAACAGGAAGGTTA  
TTCTATATTTGTCGTTAAGGGTGATCTGCCAGATTGCGAAGC  
TGACCAACTCCTGCAGTAGATTAGGGTCCAACAGTAGCAT  
CGACCAAACTTATTGGAGAAGAATTAGCACAACTAAAAGA  
GCAAAGAGTCCATAAAACAGACCTGGAACGAGTGTTAGAA  
GCAAATGATGGCTCAGGATAGTTAGACGAAGATGAGGAGG  
ATTTGCAGAGGGCTCTGGCACTAAGTCGCCAAGAAATTGA  
CTAGGAAGATGAGGAAGCAGATCTCCGCAGGGCTATTTCAG  
CTAAGTTAGCAAGGTAGTTCCAGAAACATATCTCAAGATTAG  
ACACAGACATCAGGTACAAATCTTACTTCAGAAGAGCTTCG  
GAAGAGACGAGAAGCCTACTTTGAAAAACAGCAGCAGAAA  
CAGCAGCAGCAGCAGCAGCAGCAGCAGCAGCAGCAGCAGCA  
GCAGCAGCAGCAGCAGCAGCAGCAGCAGCAGCAGCAGCAGC  
AGCAGCAGCAGCAGCAGCAGCAGCAGCAGCAGCAGCAGCAG  
CAGCAGCAGCAGCAGCAGCAGCAGCAGCAGCAGCAGCAGCA  
GCAGCAGCAGCAGCAGCAGCAGCAGCAGCAGCAGCAGCAGC  
AGCAGCAGCAGCAGCAGCAGCAGCAGCAGCAGCAGCAGCAG  
CAGCAGCAGCAGGGGGACCTATCAGGACAGAGTTCACAT  
CCATGCGAAAGGCCAGCCACCAAGTTCAGGAGCACTTGGG  
AGCGATCTCGGCGATGCTTAGAGCGAAGAAGACTAGCTTC  
AGGCAGCTGTCACCTAGTCTTTGGAACTGTCAGAAACGA  
TTTGA AACAGAAAGGAAAAAATACCCATACGATGTTCCAG  
ATTACGCTTAATAAAATGGAACAAAACTTATTTCTGAAGAA  
GATCTGTGGTAAGCCTATCCCTAACCCTCTCCTCGGTCTC  
GATTCTACGTAATAATCTAGA
